# Supplementary material
Source: publisher site journal article supplement (https://www.dovepress.com/article/353977)
Supplement: Supplementary file 1 [file get_supplementary_file.php]

Supplementary Table A

General Self-efficacy Scale (GSES)

Please read carefully and answer according to your real situation. Tick the box that matches your situation, and we will keep your answer confidential.

1. I can always manage to solve difficult problems if I try hard enough.

口Not at all true 口Hardly true 口Moderately true 口Exactly true

2. If someone opposes me, I can find the means and ways to get what I want.

口Not at all true 口Hardly true 口Moderately true 口Exactly true

3. It is easy for me to stick to my aims and accomplish my goals.

口Not at all true 口Hardly true 口Moderately true 口Exactly true

4. I am confident that I could deal efficiently with unexpected events.

口Not at all true 口Hardly true 口Moderately true 口Exactly true

5. Thanks to my resourcefulness, I know how to handle unforeseen situations.

口Not at all true 口Hardly true 口Moderately true 口Exactly true

6. I can solve most problems if I invest the necessary effort.

口Not at all true 口Hardly true 口Moderately true 口Exactly true

7. I can remain calm when facing difficulties because I can rely on my coping abilities.

口Not at all true 口Hardly true 口Moderately true 口Exactly true

8. When I am confronted with a problem, I can usually find several solutions.

口Not at all true 口Hardly true 口Moderately true 口Exactly true

9. If I am in trouble, I can usually think of a solution.

口Not at all true 口Hardly true 口Moderately true 口Exactly true

10. I can usually handle whatever comes my way.

口Not at all true 口Hardly true 口Moderately true 口Exactly true

Supplementary Table B

Symptom Checklist 90 (SCL-90)

Below is a list of problems and complaints that people sometimes have. Please read each one carefully and enter the number that best describes how much you were bothered by that problem during the past week.

|  | Item | Not At All  1 | A Little Bit  2 | Moderately  3 | Quite A Bit  4 | Extremely  5 |
| --- | --- | --- | --- | --- | --- | --- |
| 1. | Headaches |  |  |  |  |  |
| 2. | Nervousness or shakiness inside |  |  |  |  |  |
| 3. | Unwanted thoughts, words, or ideas that won't leave your mind |  |  |  |  |  |
| 4. | Faintness or dizziness |  |  |  |  |  |
| 5. | Loss of sexual interest or pleasure |  |  |  |  |  |
| 6. | Feeling critical of others |  |  |  |  |  |
| 7. | The idea that someone else can control your thoughts |  |  |  |  |  |
| 8. | Feeling others are to blame for most of your troubles |  |  |  |  |  |
| 9. | Trouble remembering things |  |  |  |  |  |
| 10. | Worried about sloppiness or carelessness |  |  |  |  |  |
| 11. | Feeling easily annoyed or irritated |  |  |  |  |  |
| 12. | Pains in heart or chest |  |  |  |  |  |
| 13. | Feeling afraid in open spaces or on the streets |  |  |  |  |  |
| 14. | Feeling low in energy or slowed down |  |  |  |  |  |
| 15. | Thoughts of ending your life |  |  |  |  |  |
| 16. | Hearing words that others do not hear |  |  |  |  |  |
| 17. | Trembling |  |  |  |  |  |
| 18. | Feeling that most people cannot be trusted |  |  |  |  |  |
| 19. | Poor appetite |  |  |  |  |  |
| 20. | Crying easily |  |  |  |  |  |
| 21. | Feeling shy or uneasy with the opposite sex |  |  |  |  |  |
| 22. | Feeling of being trapped or caught |  |  |  |  |  |
| 23. | Suddenly scared for no reason |  |  |  |  |  |
| 24. | Temper outbursts that you could not control |  |  |  |  |  |
| 25. | Feeling afraid to go out of your house alone |  |  |  |  |  |
| 26. | Blaming yourself for things |  |  |  |  |  |
| 27. | Pains in lower back |  |  |  |  |  |
| 28. | Feeling blocked in getting things done |  |  |  |  |  |
| 29. | Feeling lonely |  |  |  |  |  |
| 30. | Feeling blue |  |  |  |  |  |
| 31. | Worrying too much about things |  |  |  |  |  |
| 32. | Feeling no interest in things |  |  |  |  |  |
| 33. | Feeling fearful |  |  |  |  |  |
| 34. | Your feelings being easily hurt |  |  |  |  |  |
| 35. | Other people being aware of your private thoughts |  |  |  |  |  |
| 36. | Feeling others do not understand you or are |  |  |  |  |  |
| 37. | Feeling that people are unfriendly or dislike you |  |  |  |  |  |
| 38. | Having to do things very slowly to insure correctness |  |  |  |  |  |
| 39. | Heart pounding or racing |  |  |  |  |  |
| 40. | Nausea or upset stomach |  |  |  |  |  |
| 41. | Feeling inferior to others |  |  |  |  |  |
| 42. | Soreness of your muscles |  |  |  |  |  |
| 43. | Feeling that you are watched or talked about by |  |  |  |  |  |
| 44. | Trouble falling asleep |  |  |  |  |  |
| 45. | Having to check and double-check what you do |  |  |  |  |  |
| 46. | Difficulty making decisions |  |  |  |  |  |
| 47. | Feeling afraid to travel on buses, subways, or trains |  |  |  |  |  |
| 48. | Trouble getting your breath |  |  |  |  |  |
| 49. | Hot or cold spells |  |  |  |  |  |
| 50. | Having to avoid certain things, places, or activities because they frighten you |  |  |  |  |  |
| 51. | Your mind going blank |  |  |  |  |  |
| 52. | Numbness or tingling in parts of your body |  |  |  |  |  |
| 53. | A lump in your throat |  |  |  |  |  |
| 54. | Feeling hopeless about the future |  |  |  |  |  |
| 55. | Trouble concentrating |  |  |  |  |  |
| 56. | Feeling weak in parts of your body |  |  |  |  |  |
| 57. | Feeling tense or keyed up |  |  |  |  |  |
| 58. | Heavy feelings in your arms or legs |  |  |  |  |  |
| 59. | Thoughts of death or dying |  |  |  |  |  |
| 60. | Overeating |  |  |  |  |  |
| 61. | Feeling uneasy when people are watching or talking about you |  |  |  |  |  |
| 62. | Having thoughts that are not your own |  |  |  |  |  |
| 63. | Having urges to beat, injure, or harm someone |  |  |  |  |  |
| 64. | Awakening in the early morning |  |  |  |  |  |
| 65. | Having to repeat the same actions such as touching, counting, washing |  |  |  |  |  |
| 66. | Sleep that is restless or disturbed |  |  |  |  |  |
| 67. | Having urges to break or smash things |  |  |  |  |  |
| 68. | Having ideas or beliefs that others do not share |  |  |  |  |  |
| 69. | Feeling very self-conscious with others |  |  |  |  |  |
| 70. | Feeling uneasy in crowds, such as shopping or at a movie |  |  |  |  |  |
| 71. | Feeling everything is an effort |  |  |  |  |  |
| 72. | Spells of terror or panic |  |  |  |  |  |
| 73. | Feeling uncomfortable about eating or drinking in public |  |  |  |  |  |
| 74. | Getting into frequent arguments |  |  |  |  |  |
| 75. | Feeling nervous when you are left alone |  |  |  |  |  |
| 76. | Others not giving you proper credit for your achievements |  |  |  |  |  |
| 77. | Feeling lonely even when you are with people |  |  |  |  |  |
| 78. | Feeling so restless you couldn't sit still |  |  |  |  |  |
| 79. | Feelings of worthlessness |  |  |  |  |  |
| 80. | Feeling that familiar things are strange or unreal |  |  |  |  |  |
| 81. | Shouting or throwing things |  |  |  |  |  |
| 82. | Feeling afraid you will faint in public |  |  |  |  |  |
| 83. | Feeling that people will take advantage of you if you let them |  |  |  |  |  |
| 84. | Having thoughts about sex that bother you a lot |  |  |  |  |  |
| 85. | The idea that you should be punished for your sins |  |  |  |  |  |
| 86. | Feeling pushed to get things done |  |  |  |  |  |
| 87. | The idea that something serious is wrong with your body |  |  |  |  |  |
| 88. | Never feeling close to another person |  |  |  |  |  |
| 89. | Feelings of guilt |  |  |  |  |  |
| 90. | The idea that something is wrong with your mind |  |  |  |  |  |

**Notes:** Adapted with permission from Wang Z. The Symptoms Checklist-90. Shanghai Arch of Psychiatry. 1984;2:68-70.27
